RESEARCH ARTICLE

# Expression and localisation of thymosin beta-4 in the developing human early fetal heart

Vinay Saunders<sup>1</sup>, Jennifer M. Dewing<sup>1</sup>, Tilman Sanchez-Elsner<sup>2</sup>, David I. Wilson<sup>1\*</sup>

**1** Institute for Developmental Science, Faculty of Medicine, University of Southampton, Southampton, United Kingdom, **2** Academic Unit of Clinical and Experimental Sciences, Faculty of Medicine, University of Southampton, Southampton, United Kingdom

\* [diw@soton.ac.uk](mailto:diw@soton.ac.uk)

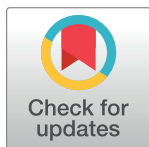

## Abstract

### Background

The objective of this study was to investigate the expression and localisation of thymosin  $\beta$ 4 (T $\beta$ 4) in the developing human heart. T $\beta$ 4 is a cardioprotective protein which may have therapeutic potential. While T $\beta$ 4 is an endogenously produced protein with known importance during development, its role within the developing human heart is not fully understood. Elucidating the localisation of T $\beta$ 4 within the developing heart will help in understanding its role during cardiac development and is crucial for understanding its potential for cardioprotection and repair in the adult heart.

### Methods

Expression of T $\beta$ 4 mRNA in the early fetal human heart was assessed by PCR using both ventricular and atrial tissue. Fluorescence immunohistochemistry was used to assess the localisation of T $\beta$ 4 in sections of early fetal human heart. Co-staining with CD31, an endothelial cell marker, and with myosin heavy chain, a cardiomyocyte marker, was used to determine whether T $\beta$ 4 is localised to these cell types within the early fetal human heart.

### Results

T $\beta$ 4 mRNA was found to be expressed in both the atria and the ventricles of the early fetal human heart. T $\beta$ 4 protein was found to be primarily localised to CD31-expressing endothelial cells and the endocardium as well as being present in the epicardium. T $\beta$ 4-associated fluorescence was greater in the compact layer of the myocardial wall and the interventricular septum than in the trabecular layer of the myocardium.

### Conclusions

The data presented illustrates expression of T $\beta$ 4 in the developing human heart and demonstrates for the first time that T $\beta$ 4 in the human heart is primarily localised to endothelial cells of the cardiac microvasculature and coronary vessels as-well as to the endothelial-like cells of the endocardium and to the epicardium.

## OPEN ACCESS

**Citation:** Saunders V, Dewing JM, Sanchez-Elsner T, Wilson DI (2018) Expression and localisation of thymosin beta-4 in the developing human early fetal heart. PLoS ONE 13(11): e0207248. <https://doi.org/10.1371/journal.pone.0207248>

**Editor:** Federica Limana, IRCCS San Raffaele Pisana, ITALY

**Received:** June 6, 2018

**Accepted:** October 26, 2018

**Published:** November 9, 2018

**Copyright:** © 2018 Saunders et al. This is an open access article distributed under the terms of the [Creative Commons Attribution License](https://creativecommons.org/licenses/by/4.0/), which permits unrestricted use, distribution, and reproduction in any medium, provided the original author and source are credited.

**Data Availability Statement:** All relevant data are within the paper and its Supporting Information files.

**Funding:** This study was funded by the Medical Research Council (<https://mrc.ukri.org/>) through Medical Research Council Capacity Building Studentship G1000406. This funding was received by DIW and VS. The funders had no role in study design, data collection and analysis, decision to publish, or preparation of the manuscript.

**Competing interests:** The authors have declared that no competing interests exist.

## Introduction

Understanding the development of the human heart can lead to insights into both congenital and acquired heart disease. The processes that occur during embryonic development of the heart are becoming better understood and a number of molecular factors are now known to play important roles in normal cardiac development [1].

If we understand the roles of such biological molecules in healthy cardiac development this may lead not only to insights into poorly understood congenital heart conditions but may also lead to novel ways to treat and manage acquired cardiac diseases.

Thymosin  $\beta$ 4 (T $\beta$ 4) is an endogenous protein which was originally identified as an actin sequestering molecule. The known functions of T $\beta$ 4 have since expanded to include roles in cell migration [2–4], angiogenesis [5], wound healing [3, 4, 6], cell survival [7–9] and suppression of inflammation [10–12].

These roles have led to interest in the therapeutic potential of T $\beta$ 4, particularly in relation to cardiovascular disease due to its reported cardioprotective effects. Exogenous treatment with recombinant T $\beta$ 4 leads to reduced infarct sizes, reduced fibrotic scarring and thus improved cardiac output in various *in vivo* models of myocardial infarction [7, 13, 14].

While there is understandable interest in using recombinant T $\beta$ 4 therapeutically, T $\beta$ 4 is in fact endogenously expressed within the heart and has been shown to have a crucial role in cardiac development [7, 15, 16]. Indeed, using short hairpin RNA to knockdown T $\beta$ 4 protein in mice leads to heart defects in embryos, with the greatest levels of T $\beta$ 4 knockdown leading to death and resorption of the embryo [16].

Thus, T $\beta$ 4 has clear importance in normal cardiac development. However, despite this, the endogenous expression and localisation of T $\beta$ 4 in the heart is not yet fully defined and while it has been partially described in relation to the murine heart there is a lack of human data.

Within mice, cardiomyocytes have been implicated in the production of T $\beta$ 4. Cardiomyocyte-specific knockdown of T $\beta$ 4 has been shown to prevent endothelial and smooth muscle cells derived from the epicardium from migrating into the heart, thus preventing coronary vessel formation [16]. This suggests that T $\beta$ 4 is produced by cardiomyocytes during early cardiac development and acts upon the epicardium in a paracrine fashion. Indeed, *in situ* hybridisation data presented in the same study demonstrates that T $\beta$ 4 mRNA is not present in the epicardium at E14.5, indicating epicardial cells do not themselves produce T $\beta$ 4 [16].

Further to this, the presence of T $\beta$ 4 mRNA in the ventricles of the murine heart has been demonstrated, with the compact layer of the myocardium and interventricular septum being enriched for T $\beta$ 4 mRNA [7, 16]. However, the cell types which express T $\beta$ 4 mRNA were not identified in these studies [7, 16].

There is little published data in relation to the localisation of T $\beta$ 4 protein within the heart in either mouse or human. In a study by Smart et al, murine heart sections (E14.5) double-stained for detection of T $\beta$ 4 and vascular endothelial growth factor receptor 2 showed relatively homogeneous staining of T $\beta$ 4 that was absent in patches where vascular endothelial growth factor receptor 2 was present [16]. This led the authors to conclude that T $\beta$ 4 protein is not localised to endothelial cells, but is present in other cells of the ventricular myocardium [16]. This complemented the T $\beta$ 4 knockdown data shown in their study, suggesting that while T $\beta$ 4 is important in endothelial cells development, it is produced by cardiomyocytes. However, in direct contrast to this, data from Banerjee et al shows T $\beta$ 4 staining in sections of an E13.5 murine heart in which T $\beta$ 4 does appear to be present in the coronary vasculature at higher levels than surrounding myocardium, though the authors themselves do not comment on this finding [17]. In human, a tissue microarray has been used to simply demonstrate that T $\beta$ 4 protein is present in the adult human heart [15].

Beyond the heart, T $\beta$ 4 mRNA is reported to be present throughout the vasculature of the developing mouse [18]. Additionally, immunofluorescence data illustrates the localisation of T $\beta$ 4 protein to endothelial cells in the developing aorta (E10.5), as well as in the smooth muscle wall of the aorta later in development (E12.5) [18]. Studies suggest that T $\beta$ 4 plays an important role in vessel formation and may even be involved in blood vessel stability [5, 16, 18].

However, while there is good evidence of an important role for T $\beta$ 4 in development of the vasculature both within the heart and throughout the body, some studies have sought to contradict these findings, concluding that T $\beta$ 4 is dispensable for murine development [17, 19]. The difference in findings between groups is likely due to differences in the techniques used to explore the functional role of T $\beta$ 4. While Smart et al used shRNAs to knock-down T $\beta$ 4, Banerjee et al used gene recombination to create knockout mice [16–19]. It is possible that in T $\beta$ 4 knockout mice, compensatory effects come in to play during development, with other members of the thymosin family fulfilling the role of T $\beta$ 4 and preventing the manifestation of any abnormal phenotype. Such compensatory mechanisms may not come in to play when shRNAs were used, since the knock-down achieved was not 100% and thus T $\beta$ 4 itself was still present during embryonic development [16].

Knowledge of the cells types in which T $\beta$ 4 is localised within the human heart would allow for a better understanding of how T $\beta$ 4 is involved in normal cardiac vascular development as well as how it endogenously mediates cardiac repair; aspects which may be utilised in the clinic. This study demonstrates the expression of T $\beta$ 4 in the developing human heart and further describes the localisation of T $\beta$ 4 protein.

## Methods

### Human fetal tissue

Human embryonic/fetal material was obtained with informed written consent and full ethical approval (Southampton and West Hampshire Local Research Ethics Committee, 296/00) from women undergoing termination of pregnancy in Southampton. Human embryonic/fetal material was also provided by the Joint MRC/Wellcome Trust (grant #099175/2/12/2) Human Developmental Biology Resource ([www.hdbr.org](http://www.hdbr.org)). Cardiac tissue used was from fetuses aged 7–12 post-conception weeks (pcw).

### RNA extraction, reverse transcription and PCR

Total RNA was extracted from cardiac tissue using standard guanidinium thiocyanate-phenol-chloroform RNA extraction methods.

RNA samples were treated with RQ1 RNase-free DNase (Promega), according to the manufacturer's instructions. Samples were then reverse transcribed to cDNA using M-MLV Reverse Transcriptase (Promega) with Random Primers (Promega), according to the manufacturer's instructions. 'No reverse transcriptase' controls were created for each RNA sample by using water in place of the reverse transcriptase enzyme.

PCR was carried out according to standard protocols using GoTaq polymerase (Promega) in combination with dNTPs and specifically designed primers. Primers were designed using PrimerSelect (Lasergene 8; DNASTAR Inc.). The primer sequences used to detect *TMSB4X* transcripts were as follows.

Forward primer: GAAGACAGAGACGCAAGAGAAAAA

Reverse primer: TGCCAGCCAGATAGATAGACAGAT.

PCR was carried out using a G-Storm GS1 thermocycler, using an annealing temperature of 58°C. The PCR products were resolved on 2% agarose gels containing Nancy-520 (Sigma

Aldrich). Gels were imaged using a High Performance Ultraviolet Transilluminator (UVP) and the associated DocIT software (UVP).

DOI: [dx.doi.org/10.17504/protocols.io.rvbd62n](https://doi.org/10.17504/protocols.io.rvbd62n)

## Immunohistochemistry

Fetal hearts were PFA-fixed, embedded in paraffin, cut into 10  $\mu\text{m}$  thick sections and the sections mounted onto aminoalkylsilane-coated glass slides.

Sections were stained according to standard methods using specific antibodies for detection of T $\beta$ 4, myosin heavy chain (MHC), CD31 and alpha smooth muscle actin (SMA).

Prior to staining, antigen retrieval was carried out using boiling 0.01 mol/L sodium citrate solution (pH 6.0) + 0.05% Tween 20.

Sections were stained with the appropriate primary and secondary antibodies. Sections stained with secondary antibodies alone were used as negative controls.

The primary antibodies used were as follows: rabbit anti-thymosin  $\beta$ 4 polyclonal antibody used at 1:1500 dilution (Millipore Cat# AB6019, RRID:AB\_10806893); mouse anti-myosin heavy chain monoclonal antibody used at 1:50 dilution (Thermo Fisher Scientific Cat# 50-6503-80, RRID:AB\_2574266); mouse anti-SMA monoclonal antibody used at 1:100 dilution (Leica Microsystems Cat# NCL-SMA, RRID:AB\_442134); sheep anti-CD31 polyclonal antibody used at 1:2000 dilution (R and D Systems Cat# AF806, RRID:AB\_355617).

The secondary antibodies used were as follows: goat anti-rabbit IgG-FITC at 1:200 dilution (Sigma-Aldrich Cat# F6005, RRID:AB\_259682); goat anti-mouse IgG-Alexa Fluor 594 at 1:200 dilution (Thermo Fisher Scientific Cat# A-11005, RRID:AB\_2534073); donkey anti-sheep IgG-Alexa Fluor 555 at 1:400 dilution (Thermo Fisher Scientific Cat# A21436, RRID:AB\_10376163).

Following staining, the sections were mounted and the nuclei counterstained using Vectashield Mounting Medium with DAPI (Vector Laboratories). Slides were imaged using a standard fluorescence microscope or a Leica SP5 confocal microscope.

DOI: [dx.doi.org/10.17504/protocols.io.rwcd7aw](https://doi.org/10.17504/protocols.io.rwcd7aw)

## Results

### Thymosin $\beta$ 4 expression in the developing heart

To confirm that *TMSB4X*, the gene for T $\beta$ 4, is expressed in the developing human heart, PCR was carried out using a set of primers designed to amplify any of the four isoforms of *TMSB4X* transcript, without distinguishing between them. PCRs were carried out on cDNA extracted from ventricular and atrial tissue samples from fetal hearts aged 7–8 pcw ( $n = 3$ ). Bands indicating detection of *TMSB4X* transcripts were seen in both the ventricular and atrial tissue samples (Fig 1A).

With *TMSB4X* expression confirmed, fluorescence immunohistochemistry was utilised to assess the localisation of T $\beta$ 4 protein within the human heart. Sections taken from human fetal hearts aged between 7 and 12 pcw were stained for T $\beta$ 4 detection ( $n = 6$ ).

T $\beta$ 4 staining was seen in the walls of the ventricles (Fig 1B & 1C) and atria (Fig 1D & 1E). The staining patterns indicated that T $\beta$ 4 protein was localised to specific cell types within the walls of both the ventricle and atria and was not expressed homogeneously throughout the myocardial walls.

Within the ventricles, T $\beta$ 4 staining was more intense in cells within the compact layer of the myocardium and the interventricular septum compared to the trabecular layer (Fig 1B & 1C). Additionally, T $\beta$ 4 was clearly present within the cells of the epicardium (open arrows) and the endocardium (closed arrows) (Fig 1B).

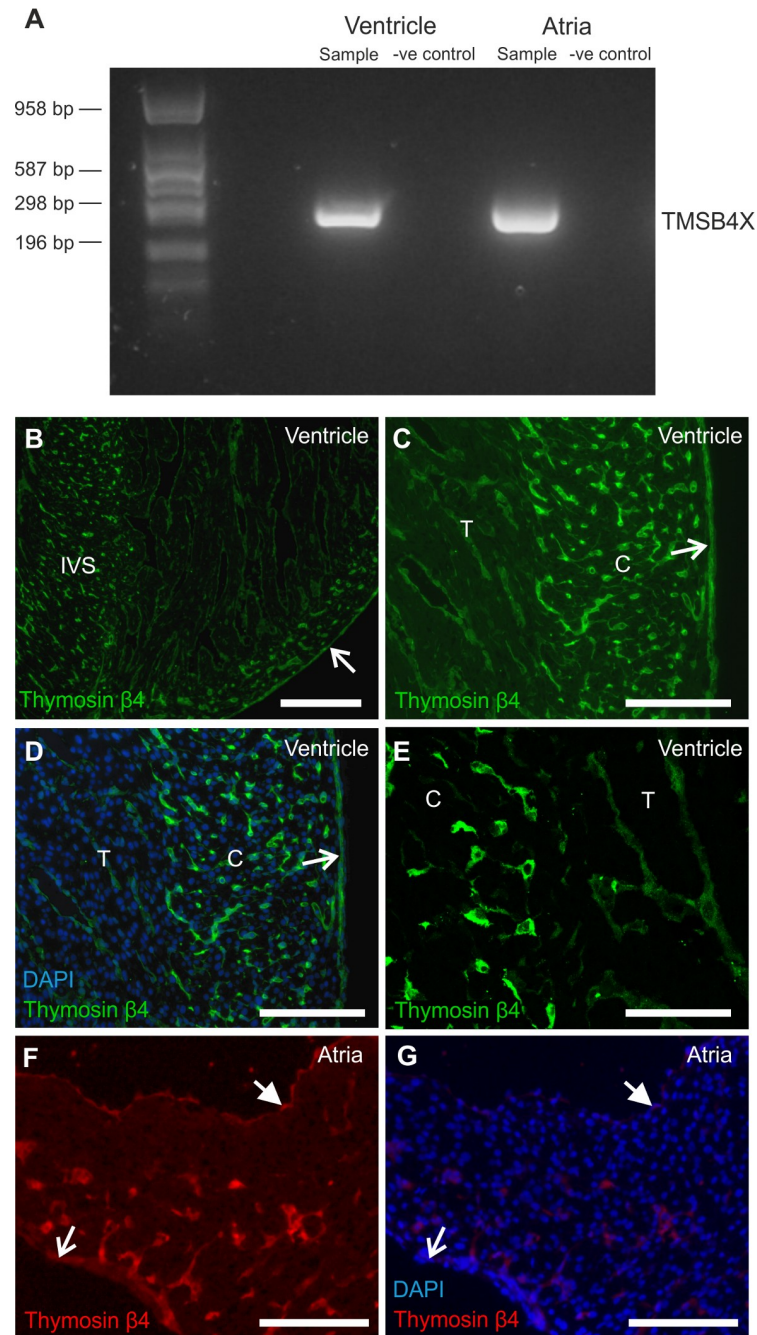

**Fig 1. Thymosin- $\beta$ 4 is expressed in the developing human heart.** A) Detection of TMSB4X cDNA (278 bp) by PCR in human fetal atria and ventricle samples. Alongside each cDNA sample a corresponding 'no reverse transcriptase' negative control sample (-ve control) was run. Representative of three individual hearts (7–8 pcw). B-G) Fluorescent immunostaining for T $\beta$ 4 protein indicates localisation to specific cells in both the ventricle (B, C, D, E) and atria (F & G), as well as to the epicardium (open arrows) and endocardium (closed arrows). DAPI nuclear staining is also shown (D & G). Within the ventricle walls, staining was more intense in the interventricular septum (IVS) and compact layer (C), compared to the trabecular layer (T). Representative of six individual hearts (7–12 pcw). Scale bars = 200  $\mu$ m (B), 150  $\mu$ m (C, D, F, G), 100  $\mu$ m (E).

<https://doi.org/10.1371/journal.pone.0207248.g001>

### Thymosin $\beta$ 4 localisation in the ventricle wall

As cardiomyocytes represent the bulk of the volume in the cardiac walls, T $\beta$ 4 and MHC dual stains were carried out in order to assess whether T $\beta$ 4 was present in cardiomyocytes. MHC is a subunit of the myosin II motor protein and in the heart is a marker of cardiomyocytes.

The immunohistochemistry demonstrated that the staining pattern of T $\beta$ 4 clearly differed from that of MHC (Fig 2), with no co-localisation seen between the two antibodies (Fig 2D–2H).

In order to assess whether T $\beta$ 4 was present within endothelial cells, triple staining for detection of T $\beta$ 4 alongside CD31, an endothelial marker, as well as MHC was carried out. Areas of T $\beta$ 4 staining were clearly co-localised with CD31 staining, indicating the presence of T $\beta$ 4 protein in endothelial cells (Fig 3). These T $\beta$ 4-positive, CD31-positive areas were absent of MHC staining (Fig 3, closed arrows).

### Thymosin $\beta$ 4 localisation in coronary vessels

As staining indicated the localisation of T $\beta$ 4 to endothelial cells in the capillaries of the ventricle wall, the presence of T $\beta$ 4 in endothelial cells of coronary vessels was assessed. Triple staining of sections was carried out for detection of T $\beta$ 4, CD31 and SMA, a smooth muscle cell maker. The staining indicated that in coronary vessels T $\beta$ 4 was co-localised to CD31-positive endothelial cells and not to the smooth muscle cells (Fig 4).

### Discussion

This study has demonstrated the expression of T $\beta$ 4 in the developing human heart and illustrated its localisation at the protein level. T $\beta$ 4 mRNA was detected in the atria and the ventricles of the developing heart and the presence of T $\beta$ 4 protein in both of these structures was confirmed by fluorescence immunohistochemistry.

Further to this, T $\beta$ 4 protein was found to be primarily localised to endothelial cells throughout the heart, including in the medium coronary vessels. T $\beta$ 4 protein was also present in the

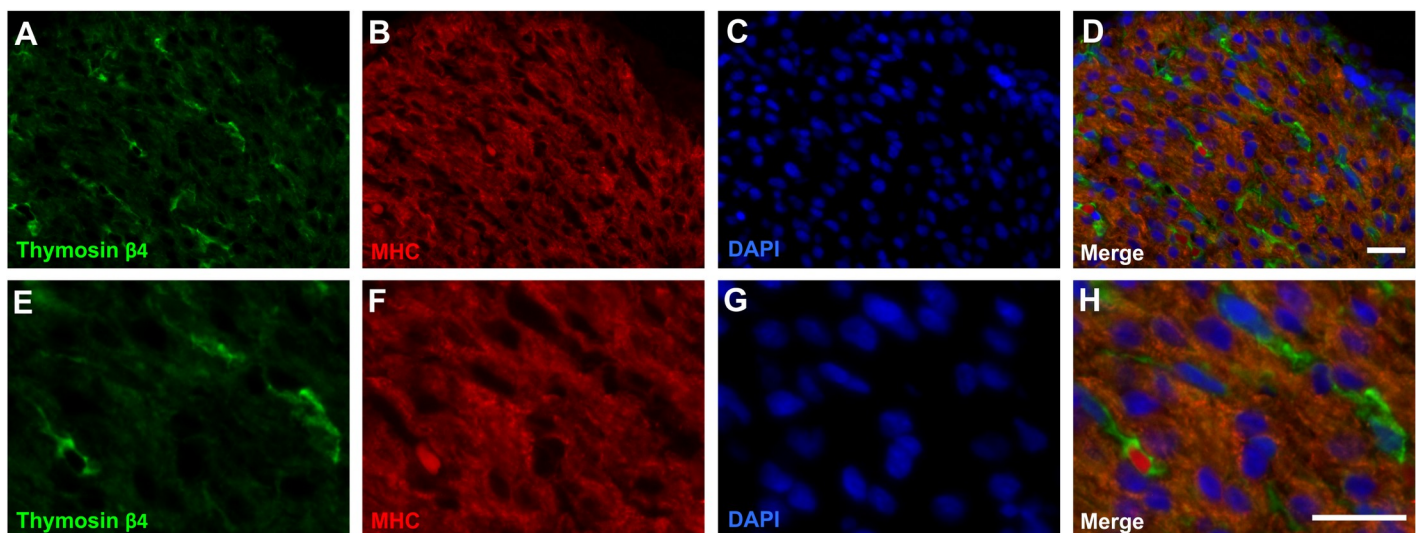

**Fig 2. Thymosin- $\beta$ 4 is not co-localised with MHC in the ventricle wall.** Fluorescent immunostaining of foetal heart sections dual stained for thymosin  $\beta$ 4 (A & E) and MHC (B & F), a cardiomyocyte marker, at low (A–D) and high (E–H) magnification. DAPI nuclear staining is also shown (C & G). Thymosin  $\beta$ 4 staining is distinct from MHC staining (H). Representative of six individual hearts (7–12 pcw). Scale bars = 25  $\mu$ m.

<https://doi.org/10.1371/journal.pone.0207248.g002>

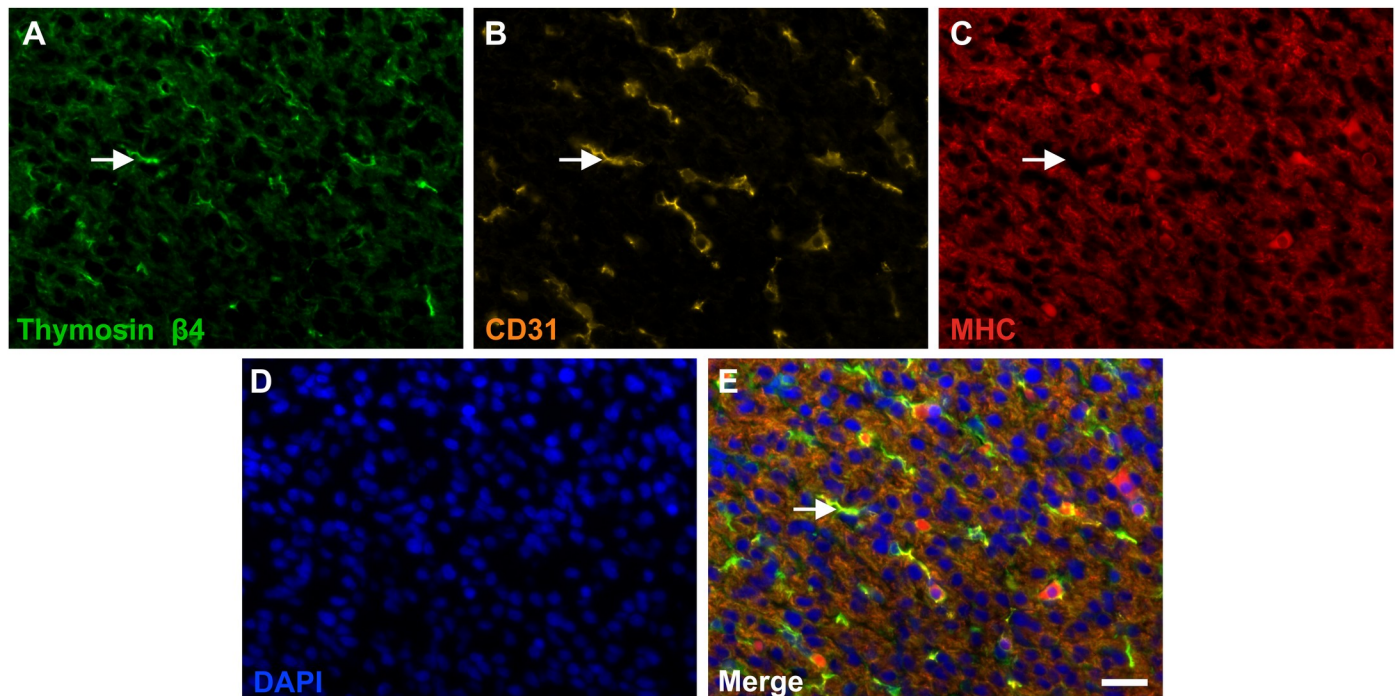

**Fig 3. Thymosin- $\beta$ 4 is primarily co-localised with CD31 in the ventricle wall.** Triple fluorescent immunostaining of fetal ventricle sections for T $\beta$ 4 (A), CD31 (B), an endothelial cell marker, and MHC (C). DAPI nuclear counterstain is also shown (D). The staining pattern of T $\beta$ 4 is similar to that of CD31, with large areas of co-localisation (E). Neither T $\beta$ 4 nor CD31 co-localises with MHC (closed arrows). Representative of six individual hearts (7–12 pcw). Scale bar = 40  $\mu$ m.

<https://doi.org/10.1371/journal.pone.0207248.g003>

endothelial-like cells of the endocardium, and was also detected within cells of the epicardium. The intensity of T $\beta$ 4 staining was greater in cells within the compact layer of the heart and the interventricular septum than within the trabecular layer of the heart, indicating these cells express higher levels of T $\beta$ 4 protein. T $\beta$ 4 staining was not apparent in cardiomyocytes.

Where observations have previously been reported in relation to the murine heart our data largely supports them. While any discrepancies may be explained by genuine differences between species, there are alternative potential explanations in all cases.

In this study T $\beta$ 4 gene expression was detected in both the ventricles and the atria using PCR. While expression in the ventricles is consistent with previously reported in situ hybridisation data in the mouse, Bock-Marquette et al [7] did not detect T $\beta$ 4 mRNA in the atria. This discrepancy may be explained by a lack of sensitivity using in situ hybridisation compared to PCR or because the cDNA probe used by Bock-Marquette et al may not detect all isoforms of murine T $\beta$ 4 transcript. The Ensembl database lists three different isoforms of murine T $\beta$ 4 transcript. The cDNA probe used by Bock-Marquette et al is described as binding to the 3'UTR of murine T $\beta$ 4 cDNA; however, isoform Tmsb4x-003 is indicated to have a shorter 3'UTR than the other 2 isoforms. This means the probes used for in situ hybridisation may not detect all isoforms, whereas the primers used in the current study were designed to detect any of the 4 isoforms of human T $\beta$ 4 mRNA listed in the Ensembl database.

An alternative explanation is that T $\beta$ 4 may only be expressed in cells of the atria in the later stages of embryonic development; in the study by Bock-Marquette et al [7], T $\beta$ 4 expression was assessed in a murine heart at E12.5, which is the equivalent to Carnegie stage 18/19 in human, while the current study used hearts ranging from Carnegie stage 20 into early fetal development (up to 12 pcw).

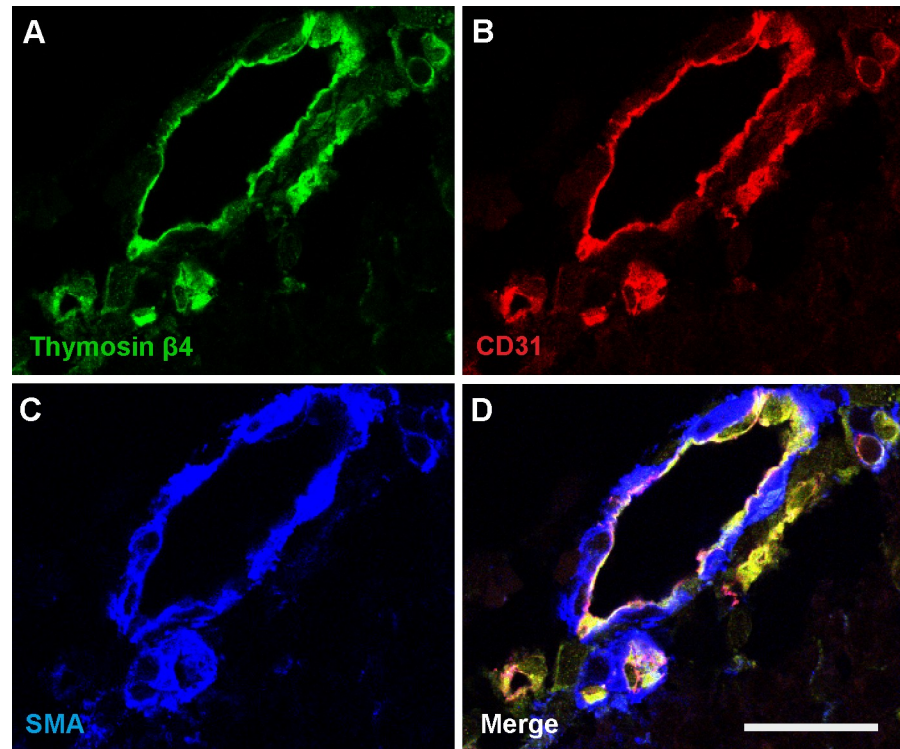

**Fig 4. Thymosin- $\beta$ 4 is localised to endothelial cells in the coronary vessels.** Confocal imaging of triple fluorescent immunostaining of a section of medium coronary vessel within the ventricle wall. Staining is for T $\beta$ 4, CD31 and SMA, a smooth muscle cell marker. The staining pattern indicates that T $\beta$ 4 is localised to the CD31-positive endothelial cells, not the smooth muscle cells. Representative of six individual hearts (7–12 pcw). Scale = 25  $\mu$ m.

<https://doi.org/10.1371/journal.pone.0207248.g004>

There is little previously published data reporting the localisation of T $\beta$ 4 protein in the developing heart. In the mouse there are conflicting reports. The data shown here is in distinct contrast to the T $\beta$ 4 staining demonstrated by Smart et al [16] in the murine heart which suggests T $\beta$ 4 is present homogeneously throughout the ventricle wall, but is absent from endothelial cells. In contrast, we show differential expression of T $\beta$ 4 between the compact layer and the trabecular layer and illustrate that T $\beta$ 4 is most abundantly present within endothelial cells. This differential expression between the compact and trabecular layers of the heart is in fact in agreement with *in situ* hybridisation data presented not only by Smart et al themselves but also by Bock-Marquette et al [7].

In addition to this, the immunostaining of T $\beta$ 4 in endothelial cells but not in cardiomyocytes in this study appears to be consistent with immunofluorescence data presented by Banerjee et al, in which T $\beta$ 4 staining is seen in specific cells in the ventricle wall including in structures which appear to be blood vessels, though the authors themselves do not draw this conclusion and simply use the staining to illustrate the presence of T $\beta$ 4 protein [17]. The presence of T $\beta$ 4 in the endothelial cells of the medium coronary vessels, shown in this study, is also consistent with the observation in mice that T $\beta$ 4 is present in blood vessels throughout the body [18].

The differential expression of T $\beta$ 4 between the compact and trabecular layers is not unique and similar differential expression is seen with several other genes during cardiac development [20]. The differential expression of T $\beta$ 4 specifically may be due to the different developmental origins of the endothelial-like endocardial cells in the trabecular layer compared to the



endothelial cells of the coronary vasculature found in the compact layer. The coronary vasculature is derived from the epicardium and migrates into the ventricle wall during formation of the compact layer at a much later stage in development than that at which endocardial cells migrate into the heart [21].

T $\beta$ 4 protein was also identified in the epicardium in our study, which may be considered to be consistent with T $\beta$ 4's presence in coronary endothelial cells shown here and with its role in formation of the coronary vessels from the epicardium, shown by Smart et al [16]. However, T $\beta$ 4 transcript was not seen in the epicardium of the murine heart at an equivalent stage of development. The cDNA probe used by Smart et al for in situ hybridisation, like that used by Bock-Marquette et al [7], is targeted to the 3'UTR of the murine T $\beta$ 4 transcript. Therefore, it may be that an isoform of T $\beta$ 4 that is not detected by the probe was present, while, in contrast, human T $\beta$ 4 transcripts all produce the same protein, meaning the antibody used here to detect T $\beta$ 4 protein would detect protein translated from all isoforms.

While, in the current study, T $\beta$ 4 protein was found to be primarily associated with endothelial cells, it is clear from knockdown studies in mice that T $\beta$ 4 is produced by cardiomyocytes, at least in the earliest stages of cardiac development, where it is of vital importance [16]. It may be that expression of T $\beta$ 4 in the heart changes throughout development, with expression initially in cardiomyocytes but with this expression changing once the epicardium has been activated and the coronary vessels and compact layer begin to form. This hypothesis may be tested by assessing T $\beta$ 4 expression within the heart throughout development, something which may be achieved most easily by studying the murine heart.

In conclusion, we show that T $\beta$ 4 is expressed in the developing human heart, where it is primarily localised to endothelial cells and cells of the endocardium and epicardium.

Information on the cellular localisation of T $\beta$ 4 will be important for the development of therapeutic approaches that utilise the beneficial effects of T $\beta$ 4. Therapeutic possibilities include the use of gene therapy to enhance T $\beta$ 4 production in relevant cells in a targeted way following a myocardial infarction. Cell therapies also have potential in cardiovascular medicine and, indeed, transplant of modified embryonic stem cells which over-express T $\beta$ 4 have been shown to have benefit in a rat model of myocardial infarction [22]. Additionally, T $\beta$ 4 has been used to facilitate the production of cardiac patches designed to replace damaged tissue following myocardial infarction [23]. Knowledge of which cells T $\beta$ 4 is important to during normal development will help to refine and enhance such cell-based therapies for clinical use.

The finding presented here reinforce the importance of T $\beta$ 4 in the development of the vasculature within the heart and may help guide future studies looking to dissect the role of T $\beta$ 4 in the developing and mature heart and its potential therapeutic roles in repairing the failing heart.

## Supporting information

### S1 Fig. Original image of DNA gel shown in Fig 1.

(TIF)

**S2 Fig. Control staining for thymosin  $\beta$ 4 antibody.** Fluorescent immunostaining images of sections stained for detection of thymosin  $\beta$ 4 (A & D), sections probed with the primary anti-thymosin  $\beta$ 4 antibody after blocking by pre-incubation with synthetic thymosin  $\beta$ 4 (B & E) and sections incubated with the secondary antibody alone (C & F). The distinct staining pattern seen in sections stained for detection of thymosin  $\beta$ 4 using the anti-thymosin  $\beta$ 4 primary antibody alongside a secondary antibody is not seen in either negative control. Scale bars = 200  $\mu$ m.

(TIF)

## Acknowledgments

David Johnston of the Biomedical Imaging Unit, University of Southampton provided assistance with confocal microscopy.

Human embryonic/fetal material was provided by the Joint MRC/Wellcome Trust (grant #099175/2/12/2) Human Developmental Biology Resource ([www.hdbr.org](http://www.hdbr.org)).

## Author Contributions

**Conceptualization:** Vinay Saunders, Tilman Sanchez-Elsner, David I. Wilson.

**Funding acquisition:** David I. Wilson.

**Investigation:** Vinay Saunders, Jennifer M. Dewing.

**Methodology:** Vinay Saunders, David I. Wilson.

**Project administration:** David I. Wilson.

**Resources:** David I. Wilson.

**Supervision:** Tilman Sanchez-Elsner, David I. Wilson.

**Validation:** Vinay Saunders.

**Visualization:** Vinay Saunders, Jennifer M. Dewing.

**Writing – original draft:** Vinay Saunders.

**Writing – review & editing:** Vinay Saunders, Jennifer M. Dewing, Tilman Sanchez-Elsner, David I. Wilson.

## References

1. Brade T, Pane LS, Moretti A, Chien KR, Laugwitz K. Embryonic heart progenitors and cardiogenesis. *Cold Spring Harb Perspect Med*. 2013; 3:a013847. <https://doi.org/10.1101/cshperspect.a013847> PMID: 24086063
2. Malinda KM, Goldstein AL, Kleinman HK. Thymosin beta 4 stimulates directional migration of human umbilical vein endothelial cells. *FASEB J*. 1997; 11:474–481 PMID: 9194528
3. Malinda KM, Sidhu GS, Mani H, Banaudha K, Maheshwari RK, Goldstein AL, et al. Thymosin beta4 accelerates wound healing. *J Invest Dermatol*. 1999; 113:364–368 <https://doi.org/10.1046/j.1523-1747.1999.00708.x> PMID: 10469335
4. Sosne G, Chan CC, Thai K, Kennedy M, Szliter EA, Hazlett LD, et al. Thymosin beta 4 promotes corneal wound healing and modulates inflammatory mediators in vivo. *Exp Eye Res*. 2001; 72:605–608 <https://doi.org/10.1006/exer.2000.0985> PMID: 11311052
5. Grant D, Rose W, Yaen C, Goldstein A, Martinez J, Kleinman H. Thymosin beta4 enhances endothelial cell differentiation and angiogenesis. *Angiogenesis*. 1999; 3:125–135 PMID: 14517430
6. Sosne G, Szliter E, Barrett R, Kernacki K, Kleinman H, Hazlett L. Thymosin beta 4 promotes corneal wound healing and decreases inflammation in vivo following alkali injury. *Exp Eye Res*. 2002; 74:293–299 <https://doi.org/10.1006/exer.2001.1125> PMID: 11950239
7. Bock-Marquette I, Saxena A, White MD, Dimaio JM, Srivastava D. Thymosin beta4 activates integrin-linked kinase and promotes cardiac cell migration, survival and cardiac repair. *Nature*. 2004; 432:466–472 <https://doi.org/10.1038/nature03000> PMID: 15565145
8. Sosne G, Siddiqi A, Kurpakus-Wheaton M. Thymosin-beta4 inhibits corneal epithelial cell apoptosis after ethanol exposure in vitro. *Invest Ophthalmol Vis Sci*. 2004; 45:1095–1100 PMID: 15037574
9. Sosne G, Albeiruti AR, Hollis B, Siddiqi A, Ellenberg D, Kurpakus-Wheaton M. Thymosin beta4 inhibits benzalkonium chloride-mediated apoptosis in corneal and conjunctival epithelial cells in vitro. *Exp Eye Res*. 2006; 83:502–507 <https://doi.org/10.1016/j.exer.2006.02.001> PMID: 16630613
10. Young JD, Lawrence AJ, MacLean AG, Leung BP, McInnes IB, Canas B, et al. Thymosin beta 4 sulfoxide is an anti-inflammatory agent generated by monocytes in the presence of glucocorticoids. *Nat Med*. 1999; 5:1424–1427 <https://doi.org/10.1038/71002> PMID: 10581087

11. Qiu P, Wheeler MK, Qiu Y, Sosne G. Thymosin beta4 inhibits tnf-alpha-induced nf-kappab activation, il-8 expression, and the sensitizing effects by its partners pinch-1 and ilk. *FASEB J.* 2011; 25:1815–1826 <https://doi.org/10.1096/fj.10-167940> PMID: 21343177
12. Sosne G, Christopherson P, Barrett R, Fridman R. Thymosin-beta4 modulates corneal matrix metallo-proteinase levels and polymorphonuclear cell infiltration after alkali injury. *Invest Ophthalmol Vis Sci.* 2005; 46:2388–2395 <https://doi.org/10.1167/iops.04-1368> PMID: 15980226
13. Hinkel R, El-Aouni C, Olson T, Horstkotte J, Mayer S, Miller S et al. Thymosin beta4 is an essential paracrine factor of embryonic endothelial progenitor cell-mediated cardioprotection. *Circulation.* 2008; 117:2232–2240 <https://doi.org/10.1161/CIRCULATIONAHA.107.758904> PMID: 18427126
14. Hinkel R, Bock-Marquette I, Hatzopoulos AK, Kupatt C. Thymosin beta4: A key factor for protective effects of eepcs in acute and chronic ischemia. *Ann N Y Acad Sci.* 2010; 1194:105–111 <https://doi.org/10.1111/j.1749-6632.2010.05489.x> PMID: 20536456
15. Jo JO, Kang YJ, Ock MS, Kleinman HK, Chang HK, Cha HJ. Thymosin beta4 expression in human tissues and in tumors using tissue microarrays. *Appl Immunohistochem Mol Morphol.* 2011; 19:160–167 <https://doi.org/10.1097/PAI.0b013e3181f12237> PMID: 20975530
16. Smart N, Risebro CA, Melville AA, Moses K, Schwartz RJ, Chien KR, et al. Thymosin beta4 induces adult epicardial progenitor mobilization and neovascularization. *Nature.* 2007; 445:177–182 <https://doi.org/10.1038/nature05383> PMID: 17108969
17. Banerjee I, Moore Morris T, Evans SM, Chen J. Thymosin beta4 is not required for embryonic viability or vascular development. *Circ Res.* 2013; 112:e25–28 <https://doi.org/10.1161/CIRCRESAHA.111.300197> PMID: 23371905
18. Rossdeutsch A, Smart N, Dube KN, Turner M, Riley PR. Essential role for thymosin beta4 in regulating vascular smooth muscle cell development and vessel wall stability. *Circ Res.* 2012; 111:e89–102 <https://doi.org/10.1161/CIRCRESAHA.111.259846> PMID: 22723298
19. Banerjee I, Zhang J, Moore-Morris T, Lange S, Shen T, Dalton ND, et al. Thymosin beta 4 is dispensable for murine cardiac development and function. *Circ Res.* 2012; 110:456–464 <https://doi.org/10.1161/CIRCRESAHA.111.258616> PMID: 22158707
20. Franco D, Lamers WH, Moorman AF. Patterns of expression in the developing myocardium: Towards a morphologically integrated transcriptional model. *Cardiovasc Res.* 1998; 38:25–53 PMID: 9683906
21. Tomanek RJ, Lotun K, Clark EB, Suvarna PR, Hu N. Vegf and bfgf stimulate myocardial vascularization in embryonic chick. *Am J Physiol.* 1998; 274:H1620–1626 PMID: 9612372
22. Yan B, Singla RD, Abdelli LS, Singal PK, Singla DK. Regulation of PTEN/Akt pathway enhances cardiomyogenesis and attenuates adverse left ventricular remodeling following thymosin beta4 overexpressing embryonic stem cell transplantation in the infarcted heart. *PLoS One* 2013; 8:e75580 <https://doi.org/10.1371/journal.pone.0075580> PMID: 24086577
23. Kumar A, Patel A, Duvalsaint L, Desai M, Marks ED. Thymosin beta4 coated nanofiber scaffolds for the repair of damaged cardiac tissue. *J Nanobiotechnology* 2014; 12:10. <https://doi.org/10.1186/1477-3155-12-10> PMID: 24661328
